# Supplementary material for: Graphene size-dependent modulation of graphene frameworks contributing to the superior thermal conductivity of epoxy composites
Source: Royal Society of Chemistry journal article supplement (doi:10.1039/c8ta03937b), 2018-01-01
Supplement: c8ta03937b1.pdf [file c8ta03937b1.pdf]

## Graphene Size-dependent Modulation of Graphene Framework Contributing to Superior Thermal Conductivity of Epoxy Composite

Hao Hou,<sup>‡a</sup> Wen Dai,<sup>‡ab</sup> Qingwei Yan,<sup>a</sup> Le Lv,<sup>a</sup> Fakhr E. Alam,<sup>a</sup> Minghui Yang,<sup>c</sup> Yagang Yao,<sup>d</sup> Xiaoliang Zeng,<sup>e</sup>  
Jian-Bin Xu,<sup>f</sup> Jinhong Yu,<sup>\*a</sup> Nan Jiang,<sup>\*a</sup> Cheng-Te Lin<sup>\*a</sup>

<sup>a</sup> Key Laboratory of Marine Materials and Related Technologies, Zhejiang Key Laboratory of Marine Materials and Protective Technologies, Ningbo Institute of Materials Technology and Engineering, Chinese Academy of Sciences, Ningbo 315201, China.

<sup>b</sup> University of Chinese Academy of Sciences, 19 A Yuquan Rd., Shijingshan District, Beijing 100049, P.R. China

<sup>c</sup> Ningbo Institute of Materials Technology and Engineering (NIMTE), Chinese Academy of Sciences, Ningbo 315201, P. R. China.

<sup>d</sup> Division of Advanced Nanomaterials, Key Laboratory of Nanodevices and Applications, Joint Key Laboratory of Functional Nanomaterials and Devices, CAS Center for Excellence in Nanoscience, Suzhou Institute of Nano-tech and Nano-bionics, Chinese Academy of Sciences, Suzhou 215123, China

<sup>e</sup> Shenzhen Institutes of Advanced Technology, Chinese Academy of Sciences, Shenzhen 518055, China

<sup>f</sup> Department of Electronics Engineering, The Chinese University of Hong Kong, Shatin, N.T., Hong Kong 999077, China.

<sup>‡</sup> These authors contribute equally

\* Corresponding authors. E-mail addresses: yujinhong@nimte.ac.cn (Jinhong Yu)

jiangnan@nimte.ac.cn (Nan Jiang)

linzhengde@nimte.ac.cn (Cheng-Te Lin);

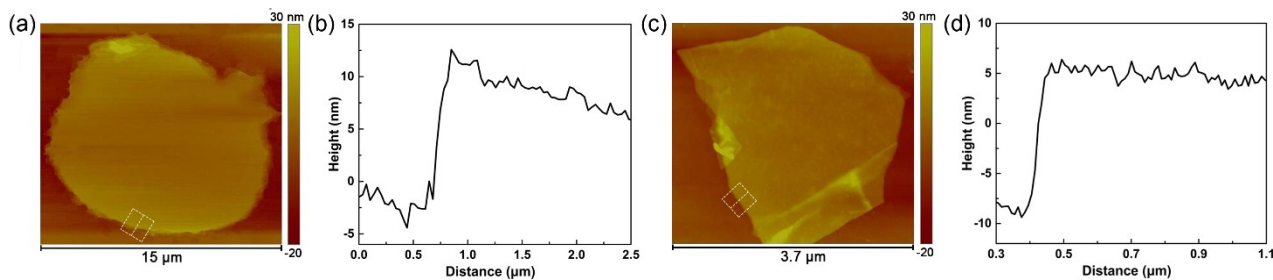

Figure S1 AFM images and thickness of (a-b) large and (c-d) small graphene sheets, respectively.

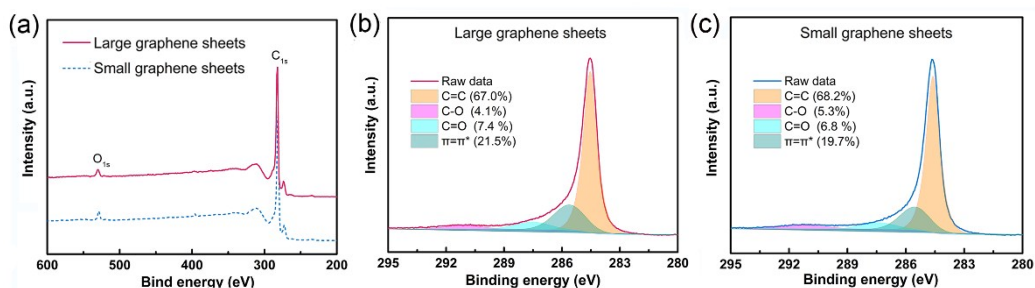

Figure S2 (a) XPS survey spectra of large and small graphene sheets. XPS-C1s spectrum of (b) large and (c) small graphene sheets.

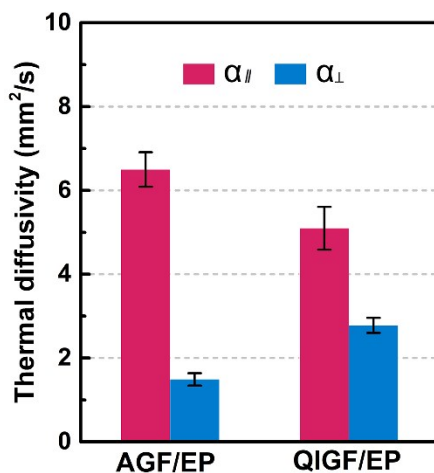

Figure S3 In- and through-plane thermal diffusivities of AGF/EP and QIGF/EP.

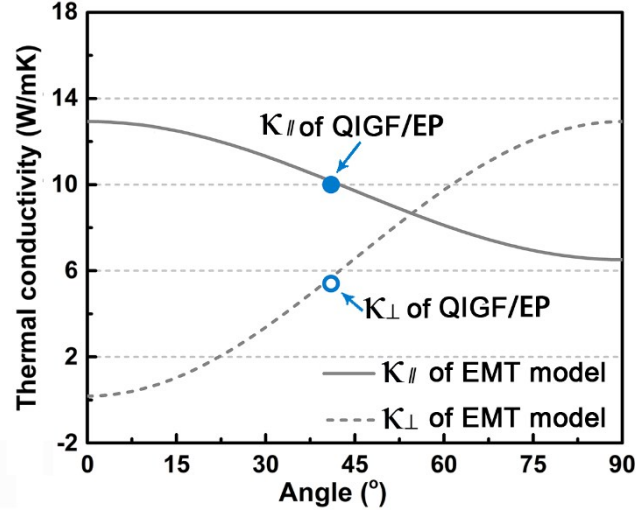

Figure S4 Deflection angle-dependent thermal conductivities of QIGF/EP composites calculated based on EMT model.

In order to explain the anisotropic ratio of QIGF/EP in theory, the thermal conductivity along in- and through-plane direction can be calculated by the effective medium theory (EMT) model, which is usually used to predict the thermal conductivity of laminate fillers/polymer system.<sup>1</sup> As the model describes,  $\kappa_{\parallel}$  and  $\kappa_{\perp}$  as the function of deflection angles of laminate fillers can be estimated based on the equation (1) and (2), respectively:

$$\kappa_{\parallel} = \kappa_m \left\{ \frac{2 + V_f \left[ \frac{\kappa_p}{\kappa_m} (1 + \langle \cos^2 \theta \rangle) \right]}{2 - V_f \left[ \frac{\kappa_p h - \kappa_m h - R_{bd} \kappa_p \kappa_m}{\kappa_p h} (1 - \langle \cos^2 \theta \rangle) \right]} \right\} \quad (1)$$

$$\kappa_{\perp} = \kappa_m \left\{ \frac{1 + V_f \left[ \frac{\kappa_p}{\kappa_m} (1 - \langle \cos^2 \theta \rangle) \right]}{1 - V_f \left[ \frac{\kappa_p h}{h + R_{bd} \kappa_p} \langle \cos^2 \theta \rangle \right]} \right\} \quad (2)$$

where  $\kappa_m$  is the thermal conductivity of the matrix material;  $\kappa_p$  is the thermal conductivity of laminate fillers in parallel direction;  $R_{bd}$  is the thermal boundary resistance between fillers and matrix;  $\theta$  is the

deflection angles of laminate fillers;  $V_f$  is the volume fraction of fillers;  $h$  is the average thickness of laminate fillers. According to the previous reports,<sup>2,3</sup> the thermal conductivity of exfoliated graphene is ranged from 250 to 600 W/mK, and an average value (425 W/mK) was employed for this calculation.  $R_{bd}$  was taken to be  $7.7 \times 10^{-8}$  Km<sup>2</sup>/W, which were derived from literature.<sup>4</sup>  $\kappa_m$  for the epoxy matrix (0.18 W/mK) was obtained by direct measurement of an epoxy.  $V_f$  was 3.1 vol% by conversion from the mass fraction of 5.5 wt%.  $h$  was around 15 nm by a statistical analysis of graphene sheets using AFM.

As a result, the evolution of theoretical thermal conductivity as a function of deflection angles of graphene sheets along in- and through-plane directions is presented in Figure S4, which is predicted from EMT model. In our work, the average angle of graphene sheets in QIGF/EP was  $\approx 41^\circ$ . Based on this, Figure S4 indicates a good agreement between theoretical and measured thermal conductivities (both of  $\kappa_{//}$  and  $\kappa_{\perp}$ ) of QIGF/EP. Moreover, the anisotropic ratio of theoretical value (1.88) is also close to the measured one.

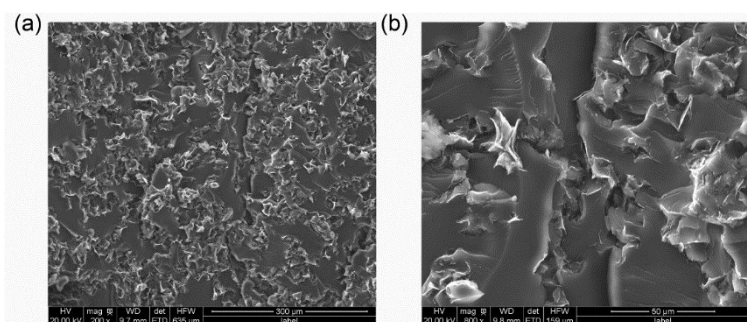

Figure S5 (a-b) SEM images of DG/EP.

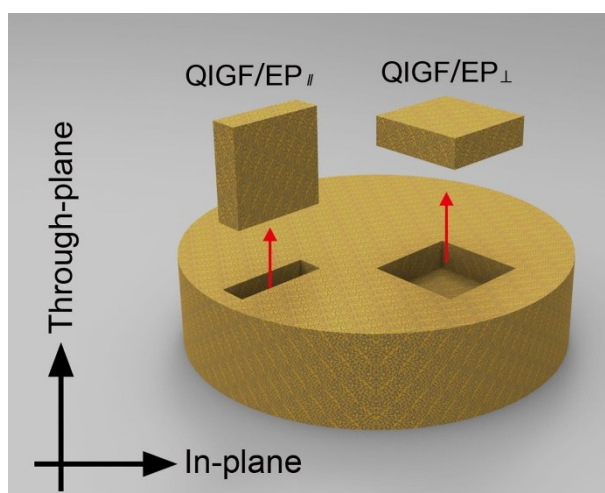

Figure S6 Schematic of the preparation of QIGF/EP<sub>⊥</sub> and QIGF/EP<sub>//</sub>.

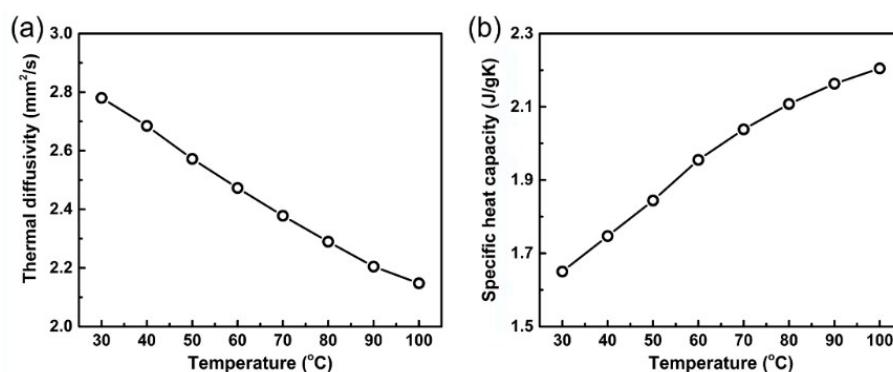

Figure S7 The variation of (a)  $\alpha_{\perp}$  and (b)  $C_p$  of QIGF/EP as a function of environmental temperature.

Table S1 Comparison of thermal conductivity of our QIGF/EP composite with reported graphene/epoxy composites.

| Filler                               | Tc (W/mK) | Fraction (wt%) | Direction     | Reference |
|--------------------------------------|-----------|----------------|---------------|-----------|
| Graphene oxide sheets                | 0.85      | 5              | Isotropic     | 5         |
| Multilayer Graphene                  | 1.5       | 5.7            | Isotropic     | 6         |
| Functionalize graphene nanosheets    | 1.91      | 4              | Isotropic     | 7         |
| Functionalized Graphene Flakes       | 1.53      | 10             | Isotropic     | 8         |
| Graphene-CNT                         | 0.321     | 1              | Isotropic     | 9         |
| Graphene-Silica                      | 0.29      | 1.5            | Isotropic     | 10        |
| Graphene coated PMMA balls           | 1.41      | 1              | Isotropic     | 11        |
| Pu foam templated graphene framework | 1.51      | 5              | Isotropic     | 12        |
| Ni templated 3D graphene framework   | 2         | 8.3            | Through-plane | 13        |
|                                      | 8.8       |                | In-plane      |           |
| Hydrothermal graphene framework      | 2.13      | 1.9            | Through-plane | 14        |
|                                      | 0.63      |                | In-plane      |           |
| QIGF                                 | 5.4       | 5.5            | Through-plane | This work |
|                                      | 10        |                | In-plane      |           |

## References

1. Y. Yao, X. Zeng, G. Pan, J. Sun, J. Hu, Y. Huang, R. Sun, J.B. Xu and C.P. Wong, *ACS Appl. Mater. Interfaces*, 2017, **4**, 2361-2366.
2. W. Lee, K. D. Kihm, H. G. Kim, S. Shin, C. Lee, J. S. Park, S. Cheon, O. M. Kwon, G. Lim and W. Lee, *Nano Lett.*, 2017, **4**, 2361-2366.
3. W. Jang, Z. Chen, W. Bao, C. N. Lau and C. Dames. *Nano Lett.*, 2010, **10**, 3909-3913.
4. Q. Li, Y. Guo, W. Li, S. Qiu, C. Zhu, X. Wei, M. Chen, C. Liu, S. Liao, Y. Gong, A. K. Mishra and L. Liu. *Chem. Mater.*, 2014, **15**, 4459-4465.
5. S. Wang, M. Tambraparni, J. Qiu, J. Tipton and D. Dean, *Macromolecules*, 2009, **42**, 5251-5255.
6. X. Shen, Z. Wang, Y. Wu, X. Liu, Y. B. He and J. K. Kim, *Nano Lett.*, 2016, **16**, 3585-3593.
7. C. C. Teng, C. C. M. Ma, C. H. Lu, S. Y. Yang, S. H. Lee, M. C. Hsiao, M. Y. Yen, K. C. Chiou and T. M. Lee, *Carbon*, 2011, **49**, 5107-5116.
8. S. H. Song, K. H. Park, B. H. Kim, Y. W. Choi, G. H. Jun, D. J. Lee, B. S. Kong, K. W. Paik and S. Jeon, *Adv. Mater.*, 2013, **25**, 732-737.
9. S. Y. Yang, W. N. Lin, Y. L. Huang, H. W. Tien, J. Y. Wang, C. C. M. Ma, S. M. Li and Y. S. Wang, *Carbon*, 2011, **49**, 793-803.
10. R. Wang, D. Zhuo, Z. Weng, L. Wu, X. Cheng, Y. Zhou, J. Wang and B. Xuan, *J. Mater. Chem. A*, 2015, **3**, 9826-9836..
11. O. Eksik, S. F. Bartolucci, T. Gupta, H. Fard, T. Borca-Tasciuc and N. Koratkar, *Carbon*, 2016, **101**, 239-244.
12. Z. Liu, D. Shen, J. Yu, W. Dai, C. Li, S. Du, N. Jiang, H. Li and C. T. Lin, *RSC Adv.*, 2016, **6**, 22364-22369.
13. X. Shen, Z. Wang, Y. Wu, X. Liu, Y. B. He, Q. Zheng, Q. H. Yang, F. Kang and J. K. Kim, *Mater. Horiz.*, 2018, **5**, 275-284
14. G. Lian, C. C. Tuan, L. Li, S. Jiao, Q. Wang, K. S. Moon, D. Cui and C. P. Wong, *Chem. Mater.*, 2016, **28**, 6096-6104..
